# Supplementary material for: Significance of gene mutations in the Wnt signaling pathway in traditional serrated adenomas of the colon and rectum
Source: PubMed Central journal article supplement (PMC7039454; doi:10.1371/journal.pone.0229262), 2020-02-24
Supplement: pone.0229262.s001.pdf [file pone.0229262.s001.pdf]

S1 Figure. List of genes in the custom Ampliseq gene panel used in this study.

|               |              |               |
|---------------|--------------|---------------|
| <i>ACVR2A</i> | <i>DKK2</i>  | <i>NRAS</i>   |
| <i>AMER1</i>  | <i>DKK3</i>  | <i>PIF1</i>   |
| <i>APC</i>    | <i>DKK4</i>  | <i>PIK3CA</i> |
| <i>ARID1A</i> | <i>FBXW7</i> | <i>PTEN</i>   |
| <i>ATM</i>    | <i>FZD3</i>  | <i>RBL1</i>   |
| <i>AXIN2</i>  | <i>FZD10</i> | <i>RNF43</i>  |
| <i>BMP4</i>   | <i>GNAS</i>  | <i>SMAD4</i>  |
| <i>BRAF</i>   | <i>GSK3B</i> | <i>SOX9</i>   |
| <i>CDKN2A</i> | <i>HRAS</i>  | <i>TCF7L2</i> |
| <i>CHD7</i>   | <i>KRAS</i>  | <i>TELO2</i>  |
| <i>CHD8</i>   | <i>LRP5</i>  | <i>TGFBR2</i> |
| <i>CTNNB1</i> | <i>MLH1</i>  | <i>TP53</i>   |
| <i>DKK1</i>   | <i>MSH6</i>  | <i>XAF1</i>   |
