# Supplementary material for: Significance of gene mutations in the Wnt signaling pathway in traditional serrated adenomas of the colon and rectum
Source: PubMed Central journal article supplement (PMC7039454; doi:10.1371/journal.pone.0229262), 2020-02-24
Supplement: pone.0229262.s004.pdf [file pone.0229262.s004.pdf]

S4 Figure. Levels of methylation of the indicated genes and LINE-1 in TSAs with *BRAF* or *KRAS* mutation.

(A) *CDKN2A*

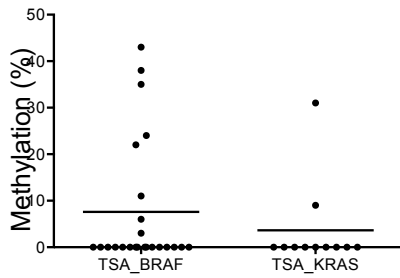

(B) *MLH1*

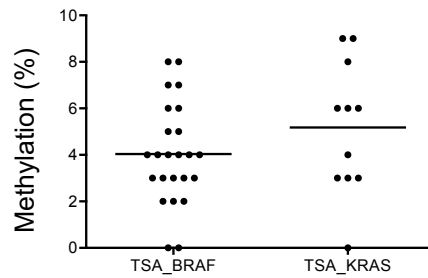

(C) *SFRP1*

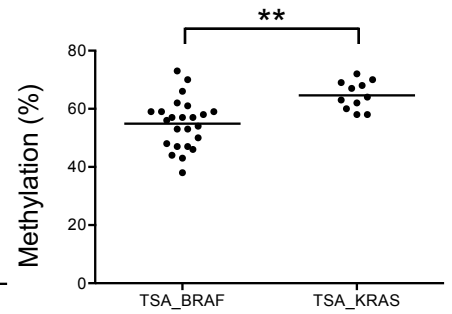

(D) *SFRP2*

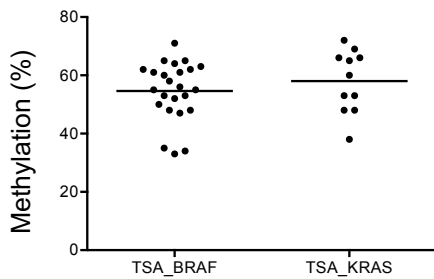

(E) *IGFBP7*

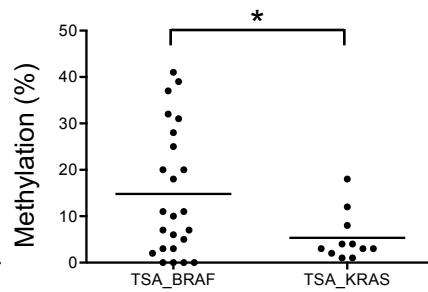

(F) *SMOC1*

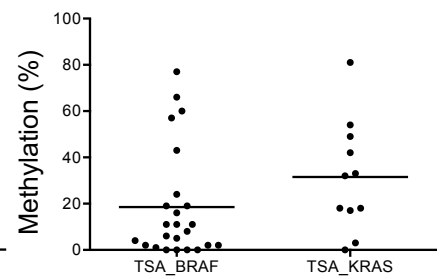

(G) *GALNT14*

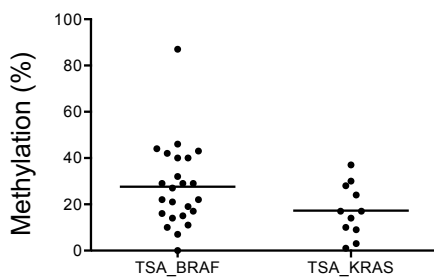

(H) *SOX5*

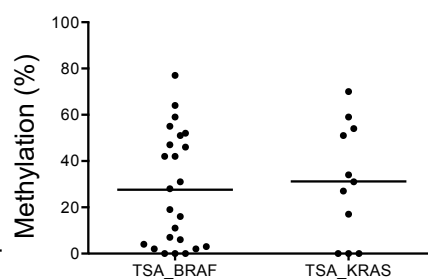

(I) LINE-1

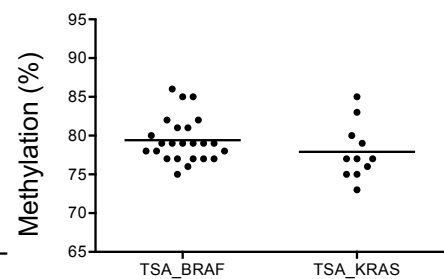

\* $P < 0.05$ , \*\* $P < 0.01$ .
